# Supplementary material for: Synthesis and Antiproliferative Activity of 2,5-bis(3′-Indolyl)pyrroles, Analogues of the Marine Alkaloid Nortopsentin
Source: MDPI journal article supplement (doi:10.3390/md11030643), 2013-03-01
Supplement: s1 [file s1]

marinedrugs-11-00643-s001.mol
  corina  04161404203D 1   1.00000     0.00000 
CORINA 3.49 0023  12.04.2013
 28 32  0  0  0  0  0  0  0  0999 V2000
   -0.0169    1.3971    0.0097 C   0  0  0  0  0  0  0  0  0  0  0  0
    0.0021   -0.0041    0.0020 C   0  0  0  0  0  0  0  0  0  0  0  0
    1.2772    1.8285   -0.0003 C   0  0  0  0  0  0  0  0  0  0  0  0
    2.0955    0.7252   -0.0141 N   0  0  0  0  0  0  0  0  0  0  0  0
    1.3075   -0.4001   -0.0126 C   0  0  0  0  0  0  0  0  0  0  0  0
    1.7214    3.2371    0.0026 C   0  0  0  0  0  0  0  0  0  0  0  0
    1.7897   -1.7961   -0.0242 C   0  0  0  0  0  0  0  0  0  0  0  0
    1.2286   -2.9268    0.7344 C   0  0  0  0  0  0  0  0  0  0  0  0
    1.1155    4.3520   -0.7451 C   0  0  0  0  0  0  0  0  0  0  0  0
    1.8752    5.4906   -0.4279 C   0  0  0  0  0  0  0  0  0  0  0  0
    2.8657    5.0966    0.4451 N   0  0  0  0  0  0  0  0  0  0  0  0
    2.7641    3.7571    0.6996 C   0  0  0  0  0  0  0  0  0  0  0  0
    2.8328   -2.2876   -0.7410 C   0  0  0  0  0  0  0  0  0  0  0  0
    2.9741   -3.6242   -0.4907 N   0  0  0  0  0  0  0  0  0  0  0  0
    2.0134   -4.0442    0.4033 C   0  0  0  0  0  0  0  0  0  0  0  0
    1.7195   -5.2771    0.9785 C   0  0  0  0  0  0  0  0  0  0  0  0
    0.6681   -5.3870    1.8616 C   0  0  0  0  0  0  0  0  0  0  0  0
   -0.1033   -4.2792    2.1842 C   0  0  0  0  0  0  0  0  0  0  0  0
    0.1666   -3.0603    1.6272 C   0  0  0  0  0  0  0  0  0  0  0  0
    0.0339    4.4562   -1.6180 C   0  0  0  0  0  0  0  0  0  0  0  0
   -0.2843    5.6686   -2.1635 C   0  0  0  0  0  0  0  0  0  0  0  0
    0.4619    6.7973   -1.8543 C   0  0  0  0  0  0  0  0  0  0  0  0
    1.5345    6.7157   -0.9939 C   0  0  0  0  0  0  0  0  0  0  0  0
   -1.1223    5.7487   -2.8401 H   0  0  0  0  0  0  0  0  0  0  0  0
   -0.9248   -4.3816    2.8778 H   0  0  0  0  0  0  0  0  0  0  0  0
    3.0654    0.7384   -0.0235 H   0  0  0  0  0  0  0  0  0  0  0  0
    3.8781    5.9851    1.0211 C   0  0  0  0  0  0  0  0  0  0  0  0
    3.9960   -4.4861   -1.0899 C   0  0  0  0  0  0  0  0  0  0  0  0
  1  2  1  0      
  1  3  2  0      
  3  4  1  0      
  4  5  1  0      
  5  2  2  0      
  3  6  1  0      
  5  7  1  0      
  7  8  1  0      
  6  9  1  0      
  9 10  2  0      
 10 11  1  0      
 11 12  1  0      
 12  6  2  0      
  7 13  2  0      
 13 14  1  0      
 14 15  1  0      
 15  8  2  0      
 15 16  1  0      
 16 17  2  0      
 17 18  1  0      
 18 19  2  0      
 19  8  1  0      
  9 20  1  0      
 20 21  2  0      
 21 22  1  0      
 22 23  2  0      
 23 10  1  0      
 21 24  1  0      
 18 25  1  0      
  4 26  1  0      
 11 27  1  0      
 14 28  1  0      
M  STY  1   1 SUP
M  SLB  1   1   1
M  SAL   1  1  27
M  SBL   1  1  31
M  SMT   1 Me
M  SBV   1 31   -7.2201    4.2246
M  STY  1   2 SUP
M  SLB  1   2   2
M  SAL   2  1  28
M  SBL   2  1  32
M  SMT   2 Me
M  SBV   2 32   -7.2188    4.2246
M  END
$$$$
