# Supplementary material for: Synthesis and Antiproliferative Activity of 2,5-bis(3′-Indolyl)pyrroles, Analogues of the Marine Alkaloid Nortopsentin
Source: MDPI journal article supplement (doi:10.3390/md11030643), 2013-03-01
Supplement: s2 [file s2]

marinedrugs-11-00643-s001.mol
  ChemDraw03251423532D

 28 32  0  0  0  0  0  0  0  0999 V2000
   -0.4125    1.6452    0.0000 C   0  0  0  0  0  0  0  0  0  0  0  0
    0.4125    1.6452    0.0000 C   0  0  0  0  0  0  0  0  0  0  0  0
   -0.6674    0.8606    0.0000 C   0  0  0  0  0  0  0  0  0  0  0  0
    0.0000    0.3756    0.0000 N   0  0  0  0  0  0  0  0  0  0  0  0
    0.6674    0.8606    0.0000 C   0  0  0  0  0  0  0  0  0  0  0  0
   -1.3819    0.4481    0.0000 C   0  0  0  0  0  0  0  0  0  0  0  0
    1.3819    0.4481    0.0000 C   0  0  0  0  0  0  0  0  0  0  0  0
    2.2069    0.4481    0.0000 C   0  0  0  0  0  0  0  0  0  0  0  0
   -2.2069    0.4481    0.0000 C   0  0  0  0  0  0  0  0  0  0  0  0
   -2.4618   -0.3366    0.0000 C   0  0  0  0  0  0  0  0  0  0  0  0
   -1.7944   -0.8215    0.0000 N   0  0  0  0  0  0  0  0  0  0  0  0
   -1.1270   -0.3366    0.0000 C   0  0  0  0  0  0  0  0  0  0  0  0
    1.1270   -0.3366    0.0000 C   0  0  0  0  0  0  0  0  0  0  0  0
    1.7944   -0.8215    0.0000 N   0  0  0  0  0  0  0  0  0  0  0  0
    2.4618   -0.3366    0.0000 C   0  0  0  0  0  0  0  0  0  0  0  0
    3.2688   -0.5081    0.0000 C   0  0  0  0  0  0  0  0  0  0  0  0
    3.8209    0.1050    0.0000 C   0  0  0  0  0  0  0  0  0  0  0  0
    3.5659    0.8896    0.0000 C   0  0  0  0  0  0  0  0  0  0  0  0
    2.7589    1.0612    0.0000 C   0  0  0  0  0  0  0  0  0  0  0  0
   -2.7589    1.0612    0.0000 C   0  0  0  0  0  0  0  0  0  0  0  0
   -3.5659    0.8896    0.0000 C   0  0  0  0  0  0  0  0  0  0  0  0
   -3.8209    0.1050    0.0000 C   0  0  0  0  0  0  0  0  0  0  0  0
   -3.2688   -0.5081    0.0000 C   0  0  0  0  0  0  0  0  0  0  0  0
   -4.1493    1.4730    0.0000 H   0  0  0  0  0  0  0  0  0  0  0  0
    4.1493    1.4730    0.0000 H   0  0  0  0  0  0  0  0  0  0  0  0
    0.0000   -0.4494    0.0000 H   0  0  0  0  0  0  0  0  0  0  0  0
   -1.7957   -1.6452    0.0000 C   0  0  0  0  0  0  0  0  0  0  0  0
    1.7944   -1.6452    0.0000 C   0  0  0  0  0  0  0  0  0  0  0  0
  1  2  1  0      
  1  3  2  0      
  3  4  1  0      
  4  5  1  0      
  5  2  2  0      
  3  6  1  0      
  5  7  1  0      
  7  8  1  0      
  6  9  1  0      
  9 10  2  0      
 10 11  1  0      
 11 12  1  0      
 12  6  2  0      
  7 13  2  0      
 13 14  1  0      
 14 15  1  0      
 15  8  2  0      
 15 16  1  0      
 16 17  2  0      
 17 18  1  0      
 18 19  2  0      
 19  8  1  0      
  9 20  1  0      
 20 21  2  0      
 21 22  1  0      
 22 23  2  0      
 23 10  1  0      
 21 24  1  0      
 18 25  1  0      
  4 26  1  0      
 11 27  1  0      
 14 28  1  0      
M  STY  1   1 SUP
M  SLB  1   1   1
M  SAL   1  1  27
M  SBL   1  1  31
M  SMT   1 Me
M  SBV   1 31   -7.2201    4.2246
M  STY  1   2 SUP
M  SLB  1   2   2
M  SAL   2  1  28
M  SBL   2  1  32
M  SMT   2 Me
M  SBV   2 32   -7.2188    4.2246
M  END
