# Supplementary material for: Synthesis and Antiproliferative Activity of 2,5-bis(3′-Indolyl)pyrroles, Analogues of the Marine Alkaloid Nortopsentin
Source: MDPI journal article supplement (doi:10.3390/md11030643), 2013-03-01
Supplement: s3 [file s3]

marinedrugs-11-00643-s002.mol
  corina  04161404203D 1   1.00000     0.00000 
CORINA 3.49 0023  12.04.2013
 30 33  0  0  0  0  0  0  0  0999 V2000
   -0.0179    1.4704    0.0101 C   0  0  0  0  0  0  0  0  0  0  0  0
   -1.1469   -0.6885    0.0093 C   0  0  0  0  0  0  0  0  0  0  0  0
    0.0021   -0.0041    0.0020 C   0  0  0  0  0  0  0  0  0  0  0  0
   -3.3461   -2.1719    0.0223 O   0  0  0  0  0  0  0  0  0  0  0  0
   -2.2860   -2.7649    0.0090 C   0  0  0  0  0  0  0  0  0  0  0  0
   -1.1281   -2.0752    0.0017 N   0  0  0  0  0  0  0  0  0  0  0  0
   -3.5226   -5.0026    0.0088 C   0  0  0  0  0  0  0  0  0  0  0  0
   -2.2658   -4.2540    0.0008 C   0  0  0  0  0  0  0  0  0  0  0  0
   -3.6806   -6.4698    0.0025 C   0  0  0  0  0  0  0  0  0  0  0  0
    1.1514    2.3663    0.0038 C   0  0  0  0  0  0  0  0  0  0  0  0
   -4.8007   -4.4785    0.0299 C   0  0  0  0  0  0  0  0  0  0  0  0
   -5.6991   -5.4804    0.0317 N   0  0  0  0  0  0  0  0  0  0  0  0
   -5.0640   -6.7064    0.0153 C   0  0  0  0  0  0  0  0  0  0  0  0
    0.6385    3.6743    0.0148 C   0  0  0  0  0  0  0  0  0  0  0  0
   -0.7363    3.5795    0.0270 N   0  0  0  0  0  0  0  0  0  0  0  0
   -1.1185    2.2671    0.0189 C   0  0  0  0  0  0  0  0  0  0  0  0
   -5.5307   -8.0168    0.0102 C   0  0  0  0  0  0  0  0  0  0  0  0
   -4.6368   -9.0656   -0.0074 C   0  0  0  0  0  0  0  0  0  0  0  0
   -3.2702   -8.8293   -0.0203 C   0  0  0  0  0  0  0  0  0  0  0  0
   -2.7884   -7.5380   -0.0120 C   0  0  0  0  0  0  0  0  0  0  0  0
    2.5294    2.1572   -0.0103 C   0  0  0  0  0  0  0  0  0  0  0  0
    3.3791    3.2279   -0.0132 C   0  0  0  0  0  0  0  0  0  0  0  0
    2.8793    4.5235   -0.0024 C   0  0  0  0  0  0  0  0  0  0  0  0
    1.5199    4.7514    0.0116 C   0  0  0  0  0  0  0  0  0  0  0  0
   -6.6613   -5.3581    0.0453 H   0  0  0  0  0  0  0  0  0  0  0  0
   -1.3447    4.3349    0.0365 H   0  0  0  0  0  0  0  0  0  0  0  0
    4.0747    5.9888   -0.0067 Br  0  0  0  0  0  0  0  0  0  0  0  0
   -6.5929   -8.2122    0.0205 H   0  0  0  0  0  0  0  0  0  0  0  0
   -1.2048   -4.8475   -0.0125 O   0  0  0  0  0  0  0  0  0  0  0  0
   -0.2816   -2.5487   -0.0089 H   0  0  0  0  0  0  0  0  0  0  0  0
  2  3  2  0      
  3  1  1  0      
  4  5  2  0      
  5  6  1  0      
  6  2  1  0      
  7  8  1  0      
  8  5  1  0      
  7  9  1  0      
  1 10  1  0      
  7 11  2  0      
 11 12  1  0      
 12 13  1  0      
 13  9  2  0      
 10 14  2  0      
 14 15  1  0      
 15 16  1  0      
 16  1  2  0      
 13 17  1  0      
 17 18  2  0      
 18 19  1  0      
 19 20  2  0      
 20  9  1  0      
 10 21  1  0      
 21 22  2  0      
 22 23  1  0      
 23 24  2  0      
 24 14  1  0      
 12 25  1  0      
 15 26  1  0      
 23 27  1  0      
 17 28  1  0      
  8 29  2  0      
  6 30  1  0      
M  END
$$$$
