# Supplementary material for: Synthesis and Antiproliferative Activity of 2,5-bis(3′-Indolyl)pyrroles, Analogues of the Marine Alkaloid Nortopsentin
Source: MDPI journal article supplement (doi:10.3390/md11030643), 2013-03-01
Supplement: s4 [file s4]

marinedrugs-11-00643-s002.mol
  ChemDraw03251423542D

 30 33  0  0  0  0  0  0  0  0999 V2000
   -1.7450    0.4285    0.0000 C   0  0  0  0  0  0  0  0  0  0  0  0
   -0.3160    0.4285    0.0000 C   0  0  0  0  0  0  0  0  0  0  0  0
   -1.0305    0.8410    0.0000 C   0  0  0  0  0  0  0  0  0  0  0  0
    1.1129   -0.3965    0.0000 O   0  0  0  0  0  0  0  0  0  0  0  0
    1.1129    0.4285    0.0000 C   0  0  0  0  0  0  0  0  0  0  0  0
    0.3984    0.8410    0.0000 N   0  0  0  0  0  0  0  0  0  0  0  0
    2.5419    0.4285    0.0000 C   0  0  0  0  0  0  0  0  0  0  0  0
    1.8274    0.8410    0.0000 C   0  0  0  0  0  0  0  0  0  0  0  0
    3.3669    0.4285    0.0000 C   0  0  0  0  0  0  0  0  0  0  0  0
   -2.5700    0.4285    0.0000 C   0  0  0  0  0  0  0  0  0  0  0  0
    2.2869   -0.3561    0.0000 C   0  0  0  0  0  0  0  0  0  0  0  0
    2.9544   -0.8410    0.0000 N   0  0  0  0  0  0  0  0  0  0  0  0
    3.6218   -0.3561    0.0000 C   0  0  0  0  0  0  0  0  0  0  0  0
   -2.8249   -0.3561    0.0000 C   0  0  0  0  0  0  0  0  0  0  0  0
   -2.1575   -0.8410    0.0000 N   0  0  0  0  0  0  0  0  0  0  0  0
   -1.4900   -0.3561    0.0000 C   0  0  0  0  0  0  0  0  0  0  0  0
    4.4288   -0.5276    0.0000 C   0  0  0  0  0  0  0  0  0  0  0  0
    4.9808    0.0855    0.0000 C   0  0  0  0  0  0  0  0  0  0  0  0
    4.7259    0.8701    0.0000 C   0  0  0  0  0  0  0  0  0  0  0  0
    3.9189    1.0416    0.0000 C   0  0  0  0  0  0  0  0  0  0  0  0
   -3.1220    1.0416    0.0000 C   0  0  0  0  0  0  0  0  0  0  0  0
   -3.9290    0.8701    0.0000 C   0  0  0  0  0  0  0  0  0  0  0  0
   -4.1839    0.0855    0.0000 C   0  0  0  0  0  0  0  0  0  0  0  0
   -3.6319   -0.5276    0.0000 C   0  0  0  0  0  0  0  0  0  0  0  0
    2.9544   -1.6660    0.0000 H   0  0  0  0  0  0  0  0  0  0  0  0
   -2.1575   -1.6660    0.0000 H   0  0  0  0  0  0  0  0  0  0  0  0
   -4.9808   -0.1281    0.0000 Br  0  0  0  0  0  0  0  0  0  0  0  0
    4.6423   -1.3245    0.0000 H   0  0  0  0  0  0  0  0  0  0  0  0
    1.8274    1.6660    0.0000 O   0  0  0  0  0  0  0  0  0  0  0  0
    0.3984    1.6660    0.0000 H   0  0  0  0  0  0  0  0  0  0  0  0
  2  3  2  0      
  3  1  1  0      
  4  5  2  0      
  5  6  1  0      
  6  2  1  0      
  7  8  1  0      
  8  5  1  0      
  7  9  1  0      
  1 10  1  0      
  7 11  2  0      
 11 12  1  0      
 12 13  1  0      
 13  9  2  0      
 10 14  2  0      
 14 15  1  0      
 15 16  1  0      
 16  1  2  0      
 13 17  1  0      
 17 18  2  0      
 18 19  1  0      
 19 20  2  0      
 20  9  1  0      
 10 21  1  0      
 21 22  2  0      
 22 23  1  0      
 23 24  2  0      
 24 14  1  0      
 12 25  1  0      
 15 26  1  0      
 23 27  1  0      
 17 28  1  0      
  8 29  2  0      
  6 30  1  0      
M  END
