# Supplementary material for: Synthesis and Antiproliferative Activity of 2,5-bis(3′-Indolyl)pyrroles, Analogues of the Marine Alkaloid Nortopsentin
Source: MDPI journal article supplement (doi:10.3390/md11030643), 2013-03-01
Supplement: s5 [file s5]

marinedrugs-11-00643-s003.mol
  corina  04161404213D 1   1.00000     0.00000 
CORINA 3.49 0023  12.04.2013
 38 42  0  0  0  0  0  0  0  0999 V2000
   -0.0164    1.3608    0.0095 C   0  0  0  0  0  0  0  0  0  0  0  0
    0.0021   -0.0041    0.0020 C   0  0  0  0  0  0  0  0  0  0  0  0
    1.2956   -0.7276   -0.0143 C   0  0  0  0  0  0  0  0  0  0  0  0
    2.5547    0.0224   -0.0228 C   0  0  0  0  0  0  0  0  0  0  0  0
    2.5362    1.3873   -0.0162 C   0  0  0  0  0  0  0  0  0  0  0  0
    1.2427    2.1108    0.0015 C   0  0  0  0  0  0  0  0  0  0  0  0
    3.8002    2.1402   -0.0238 C   0  0  0  0  0  0  0  0  0  0  0  0
    4.4115    2.8485    1.1145 C   0  0  0  0  0  0  0  0  0  0  0  0
    5.6014    3.4120    0.6253 C   0  0  0  0  0  0  0  0  0  0  0  0
    5.7046    3.0716   -0.7083 N   0  0  0  0  0  0  0  0  0  0  0  0
    4.6417    2.3153   -1.0866 C   0  0  0  0  0  0  0  0  0  0  0  0
    4.0478    3.0324    2.4468 C   0  0  0  0  0  0  0  0  0  0  0  0
    4.8609    3.7690    3.2804 C   0  0  0  0  0  0  0  0  0  0  0  0
    6.0362    4.3264    2.7984 C   0  0  0  0  0  0  0  0  0  0  0  0
    6.4086    4.1519    1.4828 C   0  0  0  0  0  0  0  0  0  0  0  0
   -1.2619   -0.7570    0.0106 C   0  0  0  0  0  0  0  0  0  0  0  0
   -1.8518   -1.4768    1.1529 C   0  0  0  0  0  0  0  0  0  0  0  0
   -3.0507   -2.0354    0.6805 C   0  0  0  0  0  0  0  0  0  0  0  0
   -3.1789   -1.6816   -0.6474 N   0  0  0  0  0  0  0  0  0  0  0  0
   -2.1232   -0.9214   -1.0380 C   0  0  0  0  0  0  0  0  0  0  0  0
   -1.4631   -1.6741    2.4763 C   0  0  0  0  0  0  0  0  0  0  0  0
   -2.2605   -2.4191    3.3175 C   0  0  0  0  0  0  0  0  0  0  0  0
   -3.4447   -2.9718    2.8521 C   0  0  0  0  0  0  0  0  0  0  0  0
   -3.8417   -2.7840    1.5455 C   0  0  0  0  0  0  0  0  0  0  0  0
   -4.2979   -2.0661   -1.5112 C   0  0  0  0  0  0  0  0  0  0  0  0
   -4.0843   -1.4863   -2.9109 C   0  0  0  0  0  0  0  0  0  0  0  0
   -4.3748   -3.5917   -1.5975 C   0  0  0  0  0  0  0  0  0  0  0  0
   -5.5836   -1.5301   -0.9363 C   0  0  0  0  0  0  0  0  0  0  0  0
   -6.3167   -0.6983   -1.6341 C   0  0  0  0  0  0  0  0  0  0  0  0
    1.3121   -1.9439   -0.0202 O   0  0  0  0  0  0  0  0  0  0  0  0
    1.2262    3.3271    0.0070 O   0  0  0  0  0  0  0  0  0  0  0  0
   -1.2024    2.0242    0.0188 O   0  0  0  0  0  0  0  0  0  0  0  0
    3.7407   -0.6410   -0.0368 O   0  0  0  0  0  0  0  0  0  0  0  0
    6.8072    3.4649   -1.5891 C   0  0  0  0  0  0  0  0  0  0  0  0
    6.5673    2.8992   -2.9903 C   0  0  0  0  0  0  0  0  0  0  0  0
    6.8826    4.9913   -1.6614 C   0  0  0  0  0  0  0  0  0  0  0  0
    8.1035    2.9232   -1.0438 C   0  0  0  0  0  0  0  0  0  0  0  0
    8.8232    2.0986   -1.7636 C   0  0  0  0  0  0  0  0  0  0  0  0
  1  2  2  0      
  2  3  1  0      
  3  4  1  0      
  4  5  2  0      
  5  6  1  0      
  6  1  1  0      
  5  7  1  0      
  7  8  1  0      
  8  9  2  0      
  9 10  1  0      
 10 11  1  0      
 11  7  2  0      
  8 12  1  0      
 12 13  2  0      
 13 14  1  0      
 14 15  2  0      
 15  9  1  0      
  2 16  1  0      
 16 17  1  0      
 17 18  2  0      
 18 19  1  0      
 19 20  1  0      
 20 16  2  0      
 17 21  1  0      
 21 22  2  0      
 22 23  1  0      
 23 24  2  0      
 24 18  1  0      
 19 25  1  0      
 25 26  1  0      
 25 27  1  0      
 25 28  1  0      
 28 29  2  0      
  3 30  2  0      
  6 31  2  0      
  1 32  1  0      
  4 33  1  0      
 10 34  1  0      
 34 35  1  0      
 34 36  1  0      
 34 37  1  0      
 37 38  2  0      
M  END
$$$$
