# Supplementary material for: Synthesis and Antiproliferative Activity of 2,5-bis(3′-Indolyl)pyrroles, Analogues of the Marine Alkaloid Nortopsentin
Source: MDPI journal article supplement (doi:10.3390/md11030643), 2013-03-01
Supplement: s6 [file s6]

marinedrugs-11-00643-s003.mol
  ChemDraw03251423542D

 38 42  0  0  0  0  0  0  0  0999 V2000
   -0.6489    0.3271    0.0000 C   0  0  0  0  0  0  0  0  0  0  0  0
   -0.6489   -0.4979    0.0000 C   0  0  0  0  0  0  0  0  0  0  0  0
    0.0656   -0.9104    0.0000 C   0  0  0  0  0  0  0  0  0  0  0  0
    0.7800   -0.4979    0.0000 C   0  0  0  0  0  0  0  0  0  0  0  0
    0.7800    0.3271    0.0000 C   0  0  0  0  0  0  0  0  0  0  0  0
    0.0656    0.7396    0.0000 C   0  0  0  0  0  0  0  0  0  0  0  0
    1.3634    0.9104    0.0000 C   0  0  0  0  0  0  0  0  0  0  0  0
    2.1884    0.9104    0.0000 C   0  0  0  0  0  0  0  0  0  0  0  0
    2.4433    1.6951    0.0000 C   0  0  0  0  0  0  0  0  0  0  0  0
    1.7759    2.1800    0.0000 N   0  0  0  0  0  0  0  0  0  0  0  0
    1.1084    1.6951    0.0000 C   0  0  0  0  0  0  0  0  0  0  0  0
    2.7404    0.2973    0.0000 C   0  0  0  0  0  0  0  0  0  0  0  0
    3.5474    0.4689    0.0000 C   0  0  0  0  0  0  0  0  0  0  0  0
    3.8023    1.2535    0.0000 C   0  0  0  0  0  0  0  0  0  0  0  0
    3.2503    1.8666    0.0000 C   0  0  0  0  0  0  0  0  0  0  0  0
   -1.3634   -0.9104    0.0000 C   0  0  0  0  0  0  0  0  0  0  0  0
   -2.1884   -0.9104    0.0000 C   0  0  0  0  0  0  0  0  0  0  0  0
   -2.4433   -1.6951    0.0000 C   0  0  0  0  0  0  0  0  0  0  0  0
   -1.7759   -2.1800    0.0000 N   0  0  0  0  0  0  0  0  0  0  0  0
   -1.1084   -1.6951    0.0000 C   0  0  0  0  0  0  0  0  0  0  0  0
   -2.7404   -0.2973    0.0000 C   0  0  0  0  0  0  0  0  0  0  0  0
   -3.5474   -0.4689    0.0000 C   0  0  0  0  0  0  0  0  0  0  0  0
   -3.8023   -1.2535    0.0000 C   0  0  0  0  0  0  0  0  0  0  0  0
   -3.2503   -1.8666    0.0000 C   0  0  0  0  0  0  0  0  0  0  0  0
   -1.7759   -3.0050    0.0000 C   0  0  0  0  0  0  0  0  0  0  0  0
   -1.0614   -2.5925    0.0000 C   0  0  0  0  0  0  0  0  0  0  0  0
   -1.3634   -3.7194    0.0000 C   0  0  0  0  0  0  0  0  0  0  0  0
   -2.4904   -3.4175    0.0000 C   0  0  0  0  0  0  0  0  0  0  0  0
   -2.4904   -4.2425    0.0000 C   0  0  0  0  0  0  0  0  0  0  0  0
    0.0656   -1.7354    0.0000 O   0  0  0  0  0  0  0  0  0  0  0  0
    0.0656    1.5646    0.0000 O   0  0  0  0  0  0  0  0  0  0  0  0
   -1.3634    0.7396    0.0000 O   0  0  0  0  0  0  0  0  0  0  0  0
    1.4945   -0.9104    0.0000 O   0  0  0  0  0  0  0  0  0  0  0  0
    1.7759    3.0050    0.0000 C   0  0  0  0  0  0  0  0  0  0  0  0
    1.1925    3.5883    0.0000 C   0  0  0  0  0  0  0  0  0  0  0  0
    1.0614    2.5925    0.0000 C   0  0  0  0  0  0  0  0  0  0  0  0
    2.4904    3.4175    0.0000 C   0  0  0  0  0  0  0  0  0  0  0  0
    2.4904    4.2425    0.0000 C   0  0  0  0  0  0  0  0  0  0  0  0
  1  2  2  0      
  2  3  1  0      
  3  4  1  0      
  4  5  2  0      
  5  6  1  0      
  6  1  1  0      
  5  7  1  0      
  7  8  1  0      
  8  9  2  0      
  9 10  1  0      
 10 11  1  0      
 11  7  2  0      
  8 12  1  0      
 12 13  2  0      
 13 14  1  0      
 14 15  2  0      
 15  9  1  0      
  2 16  1  0      
 16 17  1  0      
 17 18  2  0      
 18 19  1  0      
 19 20  1  0      
 20 16  2  0      
 17 21  1  0      
 21 22  2  0      
 22 23  1  0      
 23 24  2  0      
 24 18  1  0      
 19 25  1  0      
 25 26  1  0      
 25 27  1  0      
 25 28  1  0      
 28 29  2  0      
  3 30  2  0      
  6 31  2  0      
  1 32  1  0      
  4 33  1  0      
 10 34  1  0      
 34 35  1  0      
 34 36  1  0      
 34 37  1  0      
 37 38  2  0      
M  END
