# Supplementary material for: Synthesis and Antiproliferative Activity of 2,5-bis(3′-Indolyl)pyrroles, Analogues of the Marine Alkaloid Nortopsentin
Source: MDPI journal article supplement (doi:10.3390/md11030643), 2013-03-01
Supplement: s7 [file s7]

marinedrugs-11-00643-s004.mol
  corina  04161404213D 1   1.00000     0.00000 
CORINA 3.49 0023  12.04.2013
 30 34  0  0  0  0  0  0  0  0999 V2000
    0.1044    1.5217   -0.0604 C   0  0  0  0  0  0  0  0  0  0  0  0
    0.0021   -0.0041    0.0020 C   0  0  0  0  0  0  0  0  0  0  0  0
    0.6422   -0.5844   -1.1867 N   0  0  0  0  0  0  0  0  0  0  0  0
    2.0568   -0.1936   -1.2633 C   0  0  0  0  0  0  0  0  0  0  0  0
    2.1591    1.3322   -1.3257 C   0  0  0  0  0  0  0  0  0  0  0  0
    1.5190    1.9125   -0.1369 N   0  0  0  0  0  0  0  0  0  0  0  0
    3.6100    1.7377   -1.3639 C   0  0  0  0  0  0  0  0  0  0  0  0
    4.4589    1.8266   -2.5546 C   0  0  0  0  0  0  0  0  0  0  0  0
    5.7237    2.2420   -2.1001 C   0  0  0  0  0  0  0  0  0  0  0  0
    5.6358    2.3905   -0.7340 N   0  0  0  0  0  0  0  0  0  0  0  0
    4.3681    2.0914   -0.3142 C   0  0  0  0  0  0  0  0  0  0  0  0
    4.2490    1.5946   -3.9154 C   0  0  0  0  0  0  0  0  0  0  0  0
    5.2746    1.7723   -4.8001 C   0  0  0  0  0  0  0  0  0  0  0  0
    6.5257    2.1819   -4.3567 C   0  0  0  0  0  0  0  0  0  0  0  0
    6.7542    2.4173   -3.0180 C   0  0  0  0  0  0  0  0  0  0  0  0
    0.6972   -0.5043    1.2420 C   0  0  0  0  0  0  0  0  0  0  0  0
    0.5871   -1.8451    1.8219 C   0  0  0  0  0  0  0  0  0  0  0  0
    1.4079   -1.8450    2.9624 C   0  0  0  0  0  0  0  0  0  0  0  0
    1.9701   -0.5915    3.0583 N   0  0  0  0  0  0  0  0  0  0  0  0
    1.5390    0.1922    2.0213 C   0  0  0  0  0  0  0  0  0  0  0  0
   -0.1210   -3.0014    1.4702 C   0  0  0  0  0  0  0  0  0  0  0  0
   -0.0056   -4.1352    2.2502 C   0  0  0  0  0  0  0  0  0  0  0  0
    0.8066   -4.1314    3.3767 C   0  0  0  0  0  0  0  0  0  0  0  0
    1.5089   -3.0001    3.7340 C   0  0  0  0  0  0  0  0  0  0  0  0
    0.9504   -5.6941    4.4317 Br  0  0  0  0  0  0  0  0  0  0  0  0
    2.6092   -3.0166    5.2718 Br  0  0  0  0  0  0  0  0  0  0  0  0
    0.5434   -1.5885   -1.1968 H   0  0  0  0  0  0  0  0  0  0  0  0
    7.9287    2.4200   -5.6021 Br  0  0  0  0  0  0  0  0  0  0  0  0
   -0.9167   -3.0074    0.3687 O   0  0  0  0  0  0  0  0  0  0  0  0
    1.6628    3.3744   -0.1223 C   0  0  0  0  0  0  0  0  0  0  0  0
  1  2  1  0      
  2  3  1  0      
  3  4  1  0      
  4  5  1  0      
  5  6  1  0      
  6  1  1  0      
  5  7  1  0      
  7  8  1  0      
  8  9  2  0      
  9 10  1  0      
 10 11  1  0      
 11  7  2  0      
  8 12  1  0      
 12 13  2  0      
 13 14  1  0      
 14 15  2  0      
 15  9  1  0      
  2 16  1  0      
 16 17  1  0      
 17 18  2  0      
 18 19  1  0      
 19 20  1  0      
 20 16  2  0      
 17 21  1  0      
 21 22  2  0      
 22 23  1  0      
 23 24  2  0      
 24 18  1  0      
 23 25  1  0      
 24 26  1  0      
  3 27  1  0      
 14 28  1  0      
 21 29  1  0      
  6 30  1  0      
M  STY  1   1 SUP
M  SLB  1   1   1
M  SAL   1  1  30
M  SBL   1  1  34
M  SMT   1 Me
M  SBV   1 34   -7.3012    6.6767
M  END
$$$$
