# Supplementary material for: Synthesis and Antiproliferative Activity of 2,5-bis(3′-Indolyl)pyrroles, Analogues of the Marine Alkaloid Nortopsentin
Source: MDPI journal article supplement (doi:10.3390/md11030643), 2013-03-01
Supplement: s8 [file s8]

marinedrugs-11-00643-s004.mol
  ChemDraw03251423552D

 30 34  0  0  0  0  0  0  0  0999 V2000
   -0.7145    0.6542    0.0000 C   0  0  0  0  0  0  0  0  0  0  0  0
   -0.7145   -0.1708    0.0000 C   0  0  0  0  0  0  0  0  0  0  0  0
    0.0000   -0.5833    0.0000 N   0  0  0  0  0  0  0  0  0  0  0  0
    0.7145   -0.1708    0.0000 C   0  0  0  0  0  0  0  0  0  0  0  0
    0.7145    0.6542    0.0000 C   0  0  0  0  0  0  0  0  0  0  0  0
    0.0000    1.0667    0.0000 N   0  0  0  0  0  0  0  0  0  0  0  0
    1.4289    1.0667    0.0000 C   0  0  0  0  0  0  0  0  0  0  0  0
    2.2539    1.0667    0.0000 C   0  0  0  0  0  0  0  0  0  0  0  0
    2.5089    1.8514    0.0000 C   0  0  0  0  0  0  0  0  0  0  0  0
    1.8414    2.3363    0.0000 N   0  0  0  0  0  0  0  0  0  0  0  0
    1.1740    1.8514    0.0000 C   0  0  0  0  0  0  0  0  0  0  0  0
    2.8060    0.4537    0.0000 C   0  0  0  0  0  0  0  0  0  0  0  0
    3.6129    0.6252    0.0000 C   0  0  0  0  0  0  0  0  0  0  0  0
    3.8679    1.4098    0.0000 C   0  0  0  0  0  0  0  0  0  0  0  0
    3.3159    2.0229    0.0000 C   0  0  0  0  0  0  0  0  0  0  0  0
   -1.4289   -0.5833    0.0000 C   0  0  0  0  0  0  0  0  0  0  0  0
   -2.2539   -0.5833    0.0000 C   0  0  0  0  0  0  0  0  0  0  0  0
   -2.5089   -1.3679    0.0000 C   0  0  0  0  0  0  0  0  0  0  0  0
   -1.8414   -1.8528    0.0000 N   0  0  0  0  0  0  0  0  0  0  0  0
   -1.1740   -1.3679    0.0000 C   0  0  0  0  0  0  0  0  0  0  0  0
   -2.8060    0.0298    0.0000 C   0  0  0  0  0  0  0  0  0  0  0  0
   -3.6129   -0.1417    0.0000 C   0  0  0  0  0  0  0  0  0  0  0  0
   -3.8679   -0.9263    0.0000 C   0  0  0  0  0  0  0  0  0  0  0  0
   -3.3159   -1.5394    0.0000 C   0  0  0  0  0  0  0  0  0  0  0  0
   -4.6648   -1.1398    0.0000 Br  0  0  0  0  0  0  0  0  0  0  0  0
   -3.5294   -2.3363    0.0000 Br  0  0  0  0  0  0  0  0  0  0  0  0
    0.0000   -1.4083    0.0000 H   0  0  0  0  0  0  0  0  0  0  0  0
    4.6648    1.6233    0.0000 Br  0  0  0  0  0  0  0  0  0  0  0  0
   -2.3935    0.7443    0.0000 O   0  0  0  0  0  0  0  0  0  0  0  0
    0.0000    1.8917    0.0000 C   0  0  0  0  0  0  0  0  0  0  0  0
  1  2  1  0      
  2  3  1  0      
  3  4  1  0      
  4  5  1  0      
  5  6  1  0      
  6  1  1  0      
  5  7  1  0      
  7  8  1  0      
  8  9  2  0      
  9 10  1  0      
 10 11  1  0      
 11  7  2  0      
  8 12  1  0      
 12 13  2  0      
 13 14  1  0      
 14 15  2  0      
 15  9  1  0      
  2 16  1  0      
 16 17  1  0      
 17 18  2  0      
 18 19  1  0      
 19 20  1  0      
 20 16  2  0      
 17 21  1  0      
 21 22  2  0      
 22 23  1  0      
 23 24  2  0      
 24 18  1  0      
 23 25  1  0      
 24 26  1  0      
  3 27  1  0      
 14 28  1  0      
 21 29  1  0      
  6 30  1  0      
M  STY  1   1 SUP
M  SLB  1   1   1
M  SAL   1  1  30
M  SBL   1  1  34
M  SMT   1 Me
M  SBV   1 34   -7.3012    6.6767
M  END
