# Supplementary material for: Synthesis and Antiproliferative Activity of 2,5-bis(3′-Indolyl)pyrroles, Analogues of the Marine Alkaloid Nortopsentin
Source: MDPI journal article supplement (doi:10.3390/md11030643), 2013-03-01
Supplement: s9 [file s9]

marinedrugs-11-00643-s005.mol
  corina  04161404213D 1   1.00000     0.00000 
CORINA 3.49 0023  12.04.2013
 45 49  0  0  0  0  0  0  0  0999 V2000
    1.1241    0.4050   -1.2462 C   0  0  0  0  0  0  0  0  0  0  0  0
    0.3383    0.3936   -0.1096 C   0  0  0  0  0  0  0  0  0  0  0  0
    0.5919    1.2656    0.9194 N   0  0  0  0  0  0  0  0  0  0  0  0
    1.6203    2.1347    0.8051 C   0  0  0  0  0  0  0  0  0  0  0  0
    2.4276    2.1130   -0.4164 C   0  0  0  0  0  0  0  0  0  0  0  0
    2.1355    1.2490   -1.3761 N   0  0  0  0  0  0  0  0  0  0  0  0
    3.5597    3.0489   -0.5770 C   0  0  0  0  0  0  0  0  0  0  0  0
    4.4600    3.1497   -1.7381 C   0  0  0  0  0  0  0  0  0  0  0  0
    5.3721    4.1740   -1.4335 C   0  0  0  0  0  0  0  0  0  0  0  0
    5.0492    4.6567   -0.1836 N   0  0  0  0  0  0  0  0  0  0  0  0
    3.9692    3.9879    0.3153 C   0  0  0  0  0  0  0  0  0  0  0  0
    4.5491    2.4748   -2.9543 C   0  0  0  0  0  0  0  0  0  0  0  0
    5.5262    2.8125   -3.8488 C   0  0  0  0  0  0  0  0  0  0  0  0
    6.4314    3.8235   -3.5542 C   0  0  0  0  0  0  0  0  0  0  0  0
    6.3596    4.5032   -2.3571 C   0  0  0  0  0  0  0  0  0  0  0  0
   -0.7775   -0.5590   -0.0022 C   0  0  0  0  0  0  0  0  0  0  0  0
   -2.2000   -0.2310    0.2008 C   0  0  0  0  0  0  0  0  0  0  0  0
   -2.8778   -1.4585    0.2378 C   0  0  0  0  0  0  0  0  0  0  0  0
   -1.9386   -2.4562    0.0701 N   0  0  0  0  0  0  0  0  0  0  0  0
   -0.6993   -1.9175   -0.0767 C   0  0  0  0  0  0  0  0  0  0  0  0
   -2.9061    0.9627    0.3461 C   0  0  0  0  0  0  0  0  0  0  0  0
   -4.2711    0.9323    0.5260 C   0  0  0  0  0  0  0  0  0  0  0  0
   -4.9466   -0.2790    0.5639 C   0  0  0  0  0  0  0  0  0  0  0  0
   -4.2615   -1.4707    0.4206 C   0  0  0  0  0  0  0  0  0  0  0  0
   -4.9334   -2.6519    0.4589 O   0  0  0  0  0  0  0  0  0  0  0  0
    0.0404    1.2583    1.7174 H   0  0  0  0  0  0  0  0  0  0  0  0
    7.7751    4.2720   -4.8069 Br  0  0  0  0  0  0  0  0  0  0  0  0
   -2.1778    2.2815    0.3069 C   0  0  0  0  0  0  0  0  0  0  0  0
    1.8709    2.9223    1.7017 O   0  0  0  0  0  0  0  0  0  0  0  0
   -2.2622    2.9517    1.6797 C   0  0  0  0  0  0  0  0  0  0  0  0
   -1.4011    4.2271    1.7083 C   0  0  0  0  0  0  0  0  0  0  0  0
   -3.6298    3.4232    1.9367 N   0  0  0  0  0  0  0  0  0  0  0  0
   -3.6107    4.7813    2.0984 C   0  0  0  0  0  0  0  0  0  0  0  0
   -2.3553    5.3112    1.9791 N   0  0  0  0  0  0  0  0  0  0  0  0
   -4.4194    2.8618    1.9836 H   0  0  0  0  0  0  0  0  0  0  0  0
   -2.1310    6.2513    2.0606 H   0  0  0  0  0  0  0  0  0  0  0  0
   -4.6748    5.4943    2.3399 N   0  3  0  0  0  0  0  0  0  0  0  0
   -2.8215    3.1884   -0.7438 C   0  0  0  0  0  0  0  0  0  0  0  0
   13.8446   12.6502    8.4733 C   0  0  0  0  0  0  0  0  0  0  0  0
   13.8636   11.2513    8.4656 F   0  0  0  0  0  0  0  0  0  0  0  0
   15.1571   13.1344    8.4633 F   0  0  0  0  0  0  0  0  0  0  0  0
   13.1680   13.1136    7.3399 F   0  0  0  0  0  0  0  0  0  0  0  0
   13.1392   13.1362    9.7131 C   0  0  0  0  0  0  0  0  0  0  0  0
   12.7751   12.3380   10.5598 O   0  0  0  0  0  0  0  0  0  0  0  0
   12.9327   14.3275    9.8696 O   0  5  0  0  0  0  0  0  0  0  0  0
  1  2  2  0      
  2  3  1  0      
  3  4  1  0      
  4  5  1  0      
  5  6  2  0      
  6  1  1  0      
  5  7  1  0      
  7  8  1  0      
  8  9  2  0      
  9 10  1  0      
 10 11  1  0      
 11  7  2  0      
  8 12  1  0      
 12 13  2  0      
 13 14  1  0      
 14 15  2  0      
 15  9  1  0      
  2 16  1  0      
 16 17  1  0      
 17 18  2  0      
 18 19  1  0      
 19 20  1  0      
 20 16  2  0      
 17 21  1  0      
 21 22  2  0      
 22 23  1  0      
 23 24  2  0      
 24 18  1  0      
 24 25  1  0      
  3 26  1  0      
 14 27  1  0      
 21 28  1  0      
  4 29  2  0      
 28 30  1  0      
 30 31  1  0      
 30 32  1  0      
 32 33  4  0      
 33 34  4  0      
 34 31  1  0      
 32 35  1  0      
 34 36  1  0      
 33 37  4  0      
 28 38  1  0      
 39 40  1  0      
 39 41  1  0      
 39 42  1  0      
 39 43  1  0      
 43 44  2  0      
 43 45  1  0      
M  CHG  2  37   1  45  -1
M  STY  1   1 SUP
M  SLB  1   1   1
M  SAL   1  7  39  40  41  42  43  44  45
M  SMT   1 CF3CO2-
M  END
$$$$
