# Supplementary material for: Synthesis and Antiproliferative Activity of 2,5-bis(3′-Indolyl)pyrroles, Analogues of the Marine Alkaloid Nortopsentin
Source: MDPI journal article supplement (doi:10.3390/md11030643), 2013-03-01
Supplement: s10 [file s10]

marinedrugs-11-00643-s005.mol
  ChemDraw04161416162D

 45 49  0  0  0  0  0  0  0  0999 V2000
   -0.4713    0.2858    0.0000 C   0  0  0  0  0  0  0  0  0  0  0  0
   -0.4713   -0.5392    0.0000 C   0  0  0  0  0  0  0  0  0  0  0  0
    0.2431   -0.9517    0.0000 N   0  0  0  0  0  0  0  0  0  0  0  0
    0.9576   -0.5392    0.0000 C   0  0  0  0  0  0  0  0  0  0  0  0
    0.9576    0.2858    0.0000 C   0  0  0  0  0  0  0  0  0  0  0  0
    0.2431    0.6983    0.0000 N   0  0  0  0  0  0  0  0  0  0  0  0
    1.6721    0.6983    0.0000 C   0  0  0  0  0  0  0  0  0  0  0  0
    2.4971    0.6983    0.0000 C   0  0  0  0  0  0  0  0  0  0  0  0
    2.7520    1.4829    0.0000 C   0  0  0  0  0  0  0  0  0  0  0  0
    2.0846    1.9678    0.0000 N   0  0  0  0  0  0  0  0  0  0  0  0
    1.4171    1.4829    0.0000 C   0  0  0  0  0  0  0  0  0  0  0  0
    3.0491    0.0852    0.0000 C   0  0  0  0  0  0  0  0  0  0  0  0
    3.8561    0.2567    0.0000 C   0  0  0  0  0  0  0  0  0  0  0  0
    4.1110    1.0413    0.0000 C   0  0  0  0  0  0  0  0  0  0  0  0
    3.5590    1.6544    0.0000 C   0  0  0  0  0  0  0  0  0  0  0  0
   -1.1858   -0.9517    0.0000 C   0  0  0  0  0  0  0  0  0  0  0  0
   -2.0108   -0.9517    0.0000 C   0  0  0  0  0  0  0  0  0  0  0  0
   -2.2657   -1.7363    0.0000 C   0  0  0  0  0  0  0  0  0  0  0  0
   -1.5983   -2.2213    0.0000 N   0  0  0  0  0  0  0  0  0  0  0  0
   -0.9309   -1.7363    0.0000 C   0  0  0  0  0  0  0  0  0  0  0  0
   -2.5628   -0.3386    0.0000 C   0  0  0  0  0  0  0  0  0  0  0  0
   -3.3698   -0.5102    0.0000 C   0  0  0  0  0  0  0  0  0  0  0  0
   -3.6247   -1.2948    0.0000 C   0  0  0  0  0  0  0  0  0  0  0  0
   -3.0727   -1.9079    0.0000 C   0  0  0  0  0  0  0  0  0  0  0  0
   -3.2862   -2.7048    0.0000 O   0  0  0  0  0  0  0  0  0  0  0  0
    0.2431   -1.7767    0.0000 H   0  0  0  0  0  0  0  0  0  0  0  0
    4.9079    1.2549    0.0000 Br  0  0  0  0  0  0  0  0  0  0  0  0
   -2.1503    0.3758    0.0000 C   0  0  0  0  0  0  0  0  0  0  0  0
    1.6721   -0.9517    0.0000 O   0  0  0  0  0  0  0  0  0  0  0  0
   -2.8648    0.7883    0.0000 C   0  0  0  0  0  0  0  0  0  0  0  0
   -3.6617    0.5748    0.0000 C   0  0  0  0  0  0  0  0  0  0  0  0
   -2.8216    1.6122    0.0000 N   0  0  0  0  0  0  0  0  0  0  0  0
   -3.5918    1.9079    0.0000 C   0  0  0  0  0  0  0  0  0  0  0  0
   -4.1110    1.2667    0.0000 N   0  0  0  0  0  0  0  0  0  0  0  0
   -2.1072    2.0247    0.0000 H   0  0  0  0  0  0  0  0  0  0  0  0
   -4.9079    1.4802    0.0000 H   0  0  0  0  0  0  0  0  0  0  0  0
   -3.8054    2.7048    0.0000 N   0  3  0  0  0  0  0  0  0  0  0  0
   -1.3534    0.5893    0.0000 C   0  0  0  0  0  0  0  0  0  0  0  0
    2.3182   -1.7457    0.0000 C   0  0  0  0  0  0  0  0  0  0  0  0
    1.4932   -1.7457    0.0000 F   0  0  0  0  0  0  0  0  0  0  0  0
    3.1432   -1.7457    0.0000 F   0  0  0  0  0  0  0  0  0  0  0  0
    2.3182   -2.5707    0.0000 F   0  0  0  0  0  0  0  0  0  0  0  0
    2.3182   -0.9207    0.0000 C   0  0  0  0  0  0  0  0  0  0  0  0
    1.6038   -0.5082    0.0000 O   0  0  0  0  0  0  0  0  0  0  0  0
    3.0327   -0.5082    0.0000 O   0  5  0  0  0  0  0  0  0  0  0  0
  1  2  2  0      
  2  3  1  0      
  3  4  1  0      
  4  5  1  0      
  5  6  2  0      
  6  1  1  0      
  5  7  1  0      
  7  8  1  0      
  8  9  2  0      
  9 10  1  0      
 10 11  1  0      
 11  7  2  0      
  8 12  1  0      
 12 13  2  0      
 13 14  1  0      
 14 15  2  0      
 15  9  1  0      
  2 16  1  0      
 16 17  1  0      
 17 18  2  0      
 18 19  1  0      
 19 20  1  0      
 20 16  2  0      
 17 21  1  0      
 21 22  2  0      
 22 23  1  0      
 23 24  2  0      
 24 18  1  0      
 24 25  1  0      
  3 26  1  0      
 14 27  1  0      
 21 28  1  0      
  4 29  2  0      
 28 30  1  0      
 30 31  1  0      
 30 32  1  0      
 32 33  4  0      
 33 34  4  0      
 34 31  1  0      
 32 35  1  0      
 34 36  1  0      
 33 37  4  0      
 28 38  1  6      
 39 40  1  0      
 39 41  1  0      
 39 42  1  0      
 39 43  1  0      
 43 44  2  0      
 43 45  1  0      
M  CHG  2  37   1  45  -1
M  STY  1   1 SUP
M  SLB  1   1   1
M  SAL   1  7  39  40  41  42  43  44  45
M  SMT   1 CF3CO2-
M  END
