# Supplementary material for: Synthesis and Antiproliferative Activity of 2,5-bis(3′-Indolyl)pyrroles, Analogues of the Marine Alkaloid Nortopsentin
Source: MDPI journal article supplement (doi:10.3390/md11030643), 2013-03-01
Supplement: s11 [file s11]

marinedrugs-11-00643-s006.mol
  corina  04161404213D 1   1.00000     0.00000 
CORINA 3.49 0023  12.04.2013
 30 34  0  0  0  0  0  0  0  0999 V2000
   -0.0165    1.3651    0.0095 C   0  0  0  0  0  0  0  0  0  0  0  0
    0.0021   -0.0041    0.0020 N   0  0  0  0  0  0  0  0  0  0  0  0
    1.3199   -0.3844   -0.0126 C   0  0  0  0  0  0  0  0  0  0  0  0
    2.0733    0.6973   -0.0140 N   0  0  0  0  0  0  0  0  0  0  0  0
    1.3037    1.7771   -0.0008 C   0  0  0  0  0  0  0  0  0  0  0  0
   -1.2100    2.2305    0.0202 C   0  0  0  0  0  0  0  0  0  0  0  0
   -1.3880    3.4758    0.7870 C   0  0  0  0  0  0  0  0  0  0  0  0
   -2.6763    3.9412    0.4760 C   0  0  0  0  0  0  0  0  0  0  0  0
   -3.2359    3.0464   -0.4113 N   0  0  0  0  0  0  0  0  0  0  0  0
   -2.3599    2.0385   -0.6807 C   0  0  0  0  0  0  0  0  0  0  0  0
   -0.5823    4.1906    1.6713 C   0  0  0  0  0  0  0  0  0  0  0  0
   -1.0556    5.3535    2.2372 C   0  0  0  0  0  0  0  0  0  0  0  0
   -2.3285    5.8141    1.9310 C   0  0  0  0  0  0  0  0  0  0  0  0
   -3.1357    5.1185    1.0581 C   0  0  0  0  0  0  0  0  0  0  0  0
   -2.6894    6.7271    2.3810 H   0  0  0  0  0  0  0  0  0  0  0  0
    1.8108   -1.7691   -0.0243 C   0  0  0  0  0  0  0  0  0  0  0  0
    3.2555   -2.0363   -0.0396 C   0  0  0  0  0  0  0  0  0  0  0  0
    3.9086   -3.3581   -0.0525 C   0  0  0  0  0  0  0  0  0  0  0  0
    4.2581   -1.1096   -0.0506 C   0  0  0  0  0  0  0  0  0  0  0  0
    5.4598   -1.7355   -0.0636 N   0  0  0  0  0  0  0  0  0  0  0  0
    5.2895   -3.1049   -0.0651 C   0  0  0  0  0  0  0  0  0  0  0  0
    6.1790   -4.1744   -0.0766 C   0  0  0  0  0  0  0  0  0  0  0  0
    5.7006   -5.4665   -0.0754 C   0  0  0  0  0  0  0  0  0  0  0  0
    4.3357   -5.7150   -0.0627 C   0  0  0  0  0  0  0  0  0  0  0  0
    3.4388   -4.6692   -0.0546 C   0  0  0  0  0  0  0  0  0  0  0  0
    6.3948   -6.2938   -0.0847 H   0  0  0  0  0  0  0  0  0  0  0  0
    1.0199   -2.6959   -0.0213 O   0  0  0  0  0  0  0  0  0  0  0  0
   -4.1246    3.1252   -0.7920 H   0  0  0  0  0  0  0  0  0  0  0  0
   -0.7691   -0.5924    0.0065 H   0  0  0  0  0  0  0  0  0  0  0  0
    6.3186   -1.2846   -0.0733 H   0  0  0  0  0  0  0  0  0  0  0  0
  1  2  1  0      
  2  3  1  0      
  3  4  2  0      
  4  5  1  0      
  5  1  2  0      
  1  6  1  0      
  6  7  1  0      
  7  8  2  0      
  8  9  1  0      
  9 10  1  0      
 10  6  2  0      
  7 11  1  0      
 11 12  2  0      
 12 13  1  0      
 13 14  2  0      
 14  8  1  0      
 13 15  1  0      
  3 16  1  0      
 16 17  1  0      
 17 18  1  0      
 17 19  2  0      
 19 20  1  0      
 20 21  1  0      
 21 18  2  0      
 21 22  1  0      
 22 23  2  0      
 23 24  1  0      
 24 25  2  0      
 25 18  1  0      
 23 26  1  0      
 16 27  2  0      
  9 28  1  0      
  2 29  1  0      
 20 30  1  0      
M  END
$$$$
