# Supplementary material for: Synthesis and Antiproliferative Activity of 2,5-bis(3′-Indolyl)pyrroles, Analogues of the Marine Alkaloid Nortopsentin
Source: MDPI journal article supplement (doi:10.3390/md11030643), 2013-03-01
Supplement: s12 [file s12]

marinedrugs-11-00643-s006.mol
  ChemDraw03251423552D

 30 34  0  0  0  0  0  0  0  0999 V2000
   -0.9384    0.5482    0.0000 C   0  0  0  0  0  0  0  0  0  0  0  0
   -0.1134    0.5482    0.0000 N   0  0  0  0  0  0  0  0  0  0  0  0
    0.1415    1.3328    0.0000 C   0  0  0  0  0  0  0  0  0  0  0  0
   -0.5259    1.8177    0.0000 N   0  0  0  0  0  0  0  0  0  0  0  0
   -1.1934    1.3328    0.0000 C   0  0  0  0  0  0  0  0  0  0  0  0
   -1.3509   -0.1663    0.0000 C   0  0  0  0  0  0  0  0  0  0  0  0
   -2.1759   -0.1663    0.0000 C   0  0  0  0  0  0  0  0  0  0  0  0
   -2.4309   -0.9509    0.0000 C   0  0  0  0  0  0  0  0  0  0  0  0
   -1.7634   -1.4358    0.0000 N   0  0  0  0  0  0  0  0  0  0  0  0
   -1.0960   -0.9509    0.0000 C   0  0  0  0  0  0  0  0  0  0  0  0
   -2.7279    0.4468    0.0000 C   0  0  0  0  0  0  0  0  0  0  0  0
   -3.5349    0.2753    0.0000 C   0  0  0  0  0  0  0  0  0  0  0  0
   -3.7899   -0.5093    0.0000 C   0  0  0  0  0  0  0  0  0  0  0  0
   -3.2378   -1.1224    0.0000 C   0  0  0  0  0  0  0  0  0  0  0  0
   -4.5867   -0.7229    0.0000 H   0  0  0  0  0  0  0  0  0  0  0  0
    0.9384    1.5463    0.0000 C   0  0  0  0  0  0  0  0  0  0  0  0
    1.3509    0.8319    0.0000 C   0  0  0  0  0  0  0  0  0  0  0  0
    2.1759    0.8319    0.0000 C   0  0  0  0  0  0  0  0  0  0  0  0
    1.0960    0.0473    0.0000 C   0  0  0  0  0  0  0  0  0  0  0  0
    1.7634   -0.4377    0.0000 N   0  0  0  0  0  0  0  0  0  0  0  0
    2.4309    0.0473    0.0000 C   0  0  0  0  0  0  0  0  0  0  0  0
    3.2378   -0.1243    0.0000 C   0  0  0  0  0  0  0  0  0  0  0  0
    3.7899    0.4888    0.0000 C   0  0  0  0  0  0  0  0  0  0  0  0
    3.5349    1.2734    0.0000 C   0  0  0  0  0  0  0  0  0  0  0  0
    2.7279    1.4450    0.0000 C   0  0  0  0  0  0  0  0  0  0  0  0
    4.5867    0.2753    0.0000 H   0  0  0  0  0  0  0  0  0  0  0  0
    1.3509    2.2608    0.0000 O   0  0  0  0  0  0  0  0  0  0  0  0
   -1.7634   -2.2608    0.0000 H   0  0  0  0  0  0  0  0  0  0  0  0
    0.4699   -0.0352    0.0000 H   0  0  0  0  0  0  0  0  0  0  0  0
    1.7634   -1.2627    0.0000 H   0  0  0  0  0  0  0  0  0  0  0  0
  1  2  1  0      
  2  3  1  0      
  3  4  2  0      
  4  5  1  0      
  5  1  2  0      
  1  6  1  0      
  6  7  1  0      
  7  8  2  0      
  8  9  1  0      
  9 10  1  0      
 10  6  2  0      
  7 11  1  0      
 11 12  2  0      
 12 13  1  0      
 13 14  2  0      
 14  8  1  0      
 13 15  1  0      
  3 16  1  0      
 16 17  1  0      
 17 18  1  0      
 17 19  2  0      
 19 20  1  0      
 20 21  1  0      
 21 18  2  0      
 21 22  1  0      
 22 23  2  0      
 23 24  1  0      
 24 25  2  0      
 25 18  1  0      
 23 26  1  0      
 16 27  2  0      
  9 28  1  0      
  2 29  1  0      
 20 30  1  0      
M  END
