# Supplementary material for: Synthesis and Antiproliferative Activity of 2,5-bis(3′-Indolyl)pyrroles, Analogues of the Marine Alkaloid Nortopsentin
Source: MDPI journal article supplement (doi:10.3390/md11030643), 2013-03-01
Supplement: s13 [file s13]

marinedrugs-11-00643-s007.mol
  corina  04161404213D 1   1.00000     0.00000 
CORINA 3.49 0023  12.04.2013
 27 31  0  0  0  0  0  0  0  0999 V2000
   -0.0165    1.3685    0.0096 C   0  0  0  0  0  0  0  0  0  0  0  0
    0.0021   -0.0041    0.0020 N   0  0  0  0  0  0  0  0  0  0  0  0
    1.2778    1.7809   -0.0006 C   0  0  0  0  0  0  0  0  0  0  0  0
    2.0653    0.6883   -0.0140 N   0  0  0  0  0  0  0  0  0  0  0  0
    1.3115   -0.3891   -0.0126 C   0  0  0  0  0  0  0  0  0  0  0  0
    1.7430    3.1899    0.0021 C   0  0  0  0  0  0  0  0  0  0  0  0
    1.7997   -1.7822   -0.0243 C   0  0  0  0  0  0  0  0  0  0  0  0
    3.2053   -2.2210   -0.0400 C   0  0  0  0  0  0  0  0  0  0  0  0
    3.1394    3.6534   -0.0087 C   0  0  0  0  0  0  0  0  0  0  0  0
    3.0832    5.0575   -0.0011 C   0  0  0  0  0  0  0  0  0  0  0  0
    1.7526    5.4159    0.0132 N   0  0  0  0  0  0  0  0  0  0  0  0
    0.9646    4.2978    0.0091 C   0  0  0  0  0  0  0  0  0  0  0  0
    1.0389   -2.9090   -0.0166 C   0  0  0  0  0  0  0  0  0  0  0  0
    1.8434   -4.0072   -0.0321 N   0  0  0  0  0  0  0  0  0  0  0  0
    3.1674   -3.6257   -0.0467 C   0  0  0  0  0  0  0  0  0  0  0  0
    4.3677   -4.3317   -0.0658 C   0  0  0  0  0  0  0  0  0  0  0  0
    5.5500   -3.6149   -0.0776 C   0  0  0  0  0  0  0  0  0  0  0  0
    5.5117   -2.2279   -0.0703 C   0  0  0  0  0  0  0  0  0  0  0  0
    4.3672   -1.5775   -0.0476 N   0  0  0  0  0  0  0  0  0  0  0  0
    4.3739    3.0045   -0.0241 C   0  0  0  0  0  0  0  0  0  0  0  0
    5.5341    3.7467   -0.0317 C   0  0  0  0  0  0  0  0  0  0  0  0
    5.4789    5.1346   -0.0242 C   0  0  0  0  0  0  0  0  0  0  0  0
    4.2671    5.7887   -0.0091 C   0  0  0  0  0  0  0  0  0  0  0  0
    7.2105    2.8720   -0.0518 Br  0  0  0  0  0  0  0  0  0  0  0  0
    7.1327   -1.2542   -0.0859 Br  0  0  0  0  0  0  0  0  0  0  0  0
    1.5300   -4.9252   -0.0301 H   0  0  0  0  0  0  0  0  0  0  0  0
    1.4228    6.3281    0.0212 H   0  0  0  0  0  0  0  0  0  0  0  0
  1  2  1  0      
  1  3  2  0      
  3  4  1  0      
  4  5  2  0      
  5  2  1  0      
  3  6  1  0      
  5  7  1  0      
  7  8  1  0      
  6  9  1  0      
  9 10  2  0      
 10 11  1  0      
 11 12  1  0      
 12  6  2  0      
  7 13  2  0      
 13 14  1  0      
 14 15  1  0      
 15  8  2  0      
 15 16  1  0      
 16 17  2  0      
 17 18  1  0      
 18 19  2  0      
 19  8  1  0      
  9 20  1  0      
 20 21  2  0      
 21 22  1  0      
 22 23  2  0      
 23 10  1  0      
 21 24  1  0      
 18 25  1  0      
 14 26  1  0      
 11 27  1  0      
M  END
$$$$
