# Supplementary material for: Synthesis and Antiproliferative Activity of 2,5-bis(3′-Indolyl)pyrroles, Analogues of the Marine Alkaloid Nortopsentin
Source: MDPI journal article supplement (doi:10.3390/md11030643), 2013-03-01
Supplement: s14 [file s14]

marinedrugs-11-00643-s007.mol
  ChemDraw03251423562D

 27 31  0  0  0  0  0  0  0  0999 V2000
   -0.4125    1.6458    0.0000 C   0  0  0  0  0  0  0  0  0  0  0  0
    0.4125    1.6458    0.0000 N   0  0  0  0  0  0  0  0  0  0  0  0
   -0.6674    0.8612    0.0000 C   0  0  0  0  0  0  0  0  0  0  0  0
    0.0000    0.3763    0.0000 N   0  0  0  0  0  0  0  0  0  0  0  0
    0.6674    0.8612    0.0000 C   0  0  0  0  0  0  0  0  0  0  0  0
   -1.3819    0.4487    0.0000 C   0  0  0  0  0  0  0  0  0  0  0  0
    1.3819    0.4487    0.0000 C   0  0  0  0  0  0  0  0  0  0  0  0
    2.2069    0.4487    0.0000 C   0  0  0  0  0  0  0  0  0  0  0  0
   -2.2069    0.4487    0.0000 C   0  0  0  0  0  0  0  0  0  0  0  0
   -2.4618   -0.3359    0.0000 C   0  0  0  0  0  0  0  0  0  0  0  0
   -1.7944   -0.8208    0.0000 N   0  0  0  0  0  0  0  0  0  0  0  0
   -1.1270   -0.3359    0.0000 C   0  0  0  0  0  0  0  0  0  0  0  0
    1.1270   -0.3359    0.0000 C   0  0  0  0  0  0  0  0  0  0  0  0
    1.7944   -0.8208    0.0000 N   0  0  0  0  0  0  0  0  0  0  0  0
    2.4618   -0.3359    0.0000 C   0  0  0  0  0  0  0  0  0  0  0  0
    3.2688   -0.5074    0.0000 C   0  0  0  0  0  0  0  0  0  0  0  0
    3.8209    0.1057    0.0000 C   0  0  0  0  0  0  0  0  0  0  0  0
    3.5659    0.8903    0.0000 C   0  0  0  0  0  0  0  0  0  0  0  0
    2.7589    1.0618    0.0000 N   0  0  0  0  0  0  0  0  0  0  0  0
   -2.7589    1.0618    0.0000 C   0  0  0  0  0  0  0  0  0  0  0  0
   -3.5659    0.8903    0.0000 C   0  0  0  0  0  0  0  0  0  0  0  0
   -3.8209    0.1057    0.0000 C   0  0  0  0  0  0  0  0  0  0  0  0
   -3.2688   -0.5074    0.0000 C   0  0  0  0  0  0  0  0  0  0  0  0
   -4.1493    1.4736    0.0000 Br  0  0  0  0  0  0  0  0  0  0  0  0
    4.1493    1.4736    0.0000 Br  0  0  0  0  0  0  0  0  0  0  0  0
    1.7944   -1.6458    0.0000 H   0  0  0  0  0  0  0  0  0  0  0  0
   -1.7944   -1.6458    0.0000 H   0  0  0  0  0  0  0  0  0  0  0  0
  1  2  1  0      
  1  3  2  0      
  3  4  1  0      
  4  5  2  0      
  5  2  1  0      
  3  6  1  0      
  5  7  1  0      
  7  8  1  0      
  6  9  1  0      
  9 10  2  0      
 10 11  1  0      
 11 12  1  0      
 12  6  2  0      
  7 13  2  0      
 13 14  1  0      
 14 15  1  0      
 15  8  2  0      
 15 16  1  0      
 16 17  2  0      
 17 18  1  0      
 18 19  2  0      
 19  8  1  0      
  9 20  1  0      
 20 21  2  0      
 21 22  1  0      
 22 23  2  0      
 23 10  1  0      
 21 24  1  0      
 18 25  1  0      
 14 26  1  0      
 11 27  1  0      
M  END
